# Supplementary material for: Controlling the band structure and photocatalytic performance of single atom Ag/C3N4 catalysts by variation of silver concentration
Source: Royal Society of Chemistry journal article supplement (doi:10.1039/d1qi01138c), 2021-11-15
Supplement: d1qi01138c1.pdf [file d1qi01138c1.pdf]

# Supporting Information

Controlling the band structure and photocatalytic performance  
of single atom Ag/C<sub>3</sub>N<sub>4</sub> catalysts by variation of silver

Jiayu Xin, Fei Li, Zhen Li, Jiaqi Zhao, Yu Wang\*

*State Key Laboratory of Inorganic Synthesis and Preparative Chemistry, College of Chemistry, Jilin*

*University, 2699 Qianjin Street, Changchun 130012, P. R. China.*

\* Corresponding author.

Tel.: 86 431 85167482;

\* E-mail address: wangyu@jlu.edu.cn (Y. Wang);

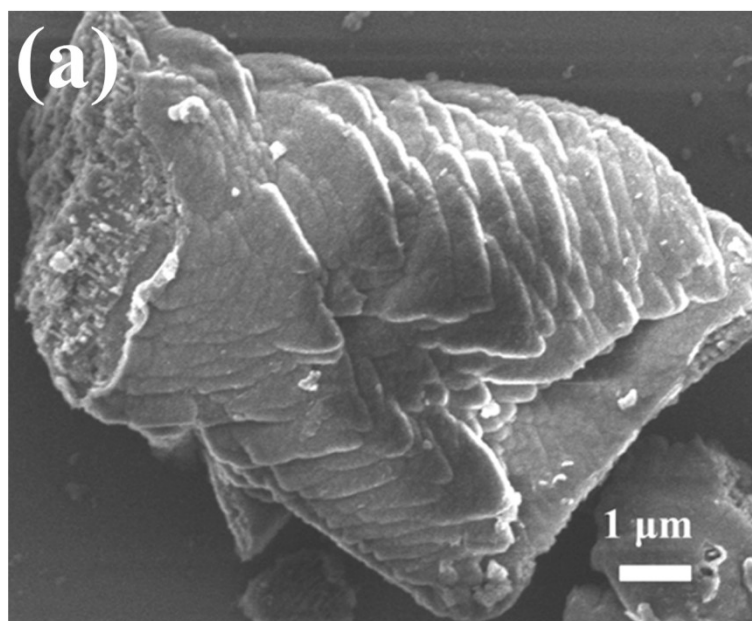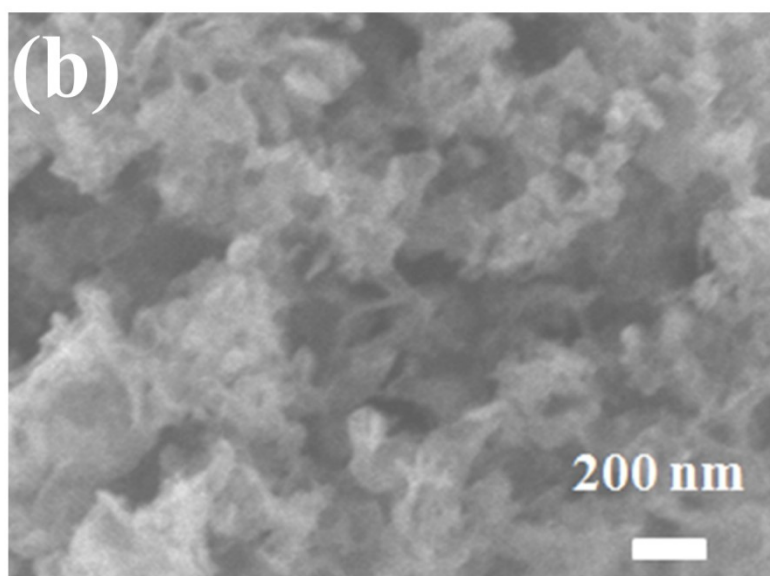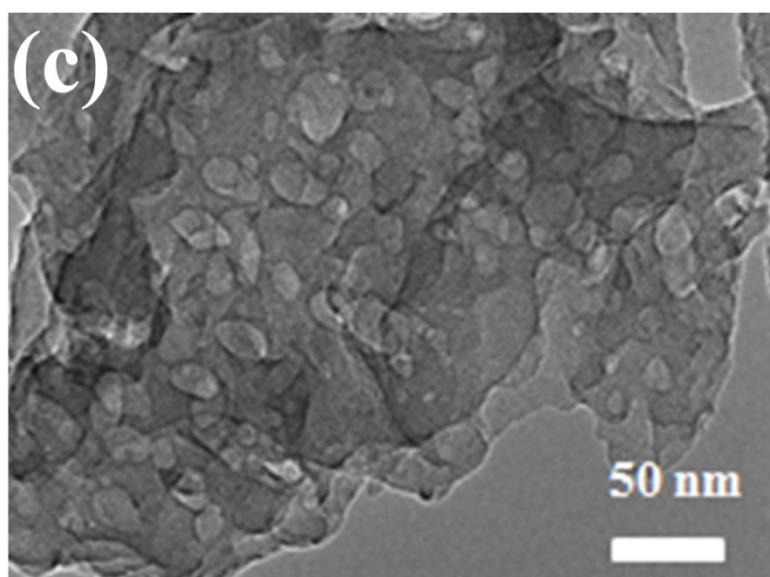

**Fig. S1** (a) SEM of BCN and (b) PCNNs and (c) TEM of PCNNs.

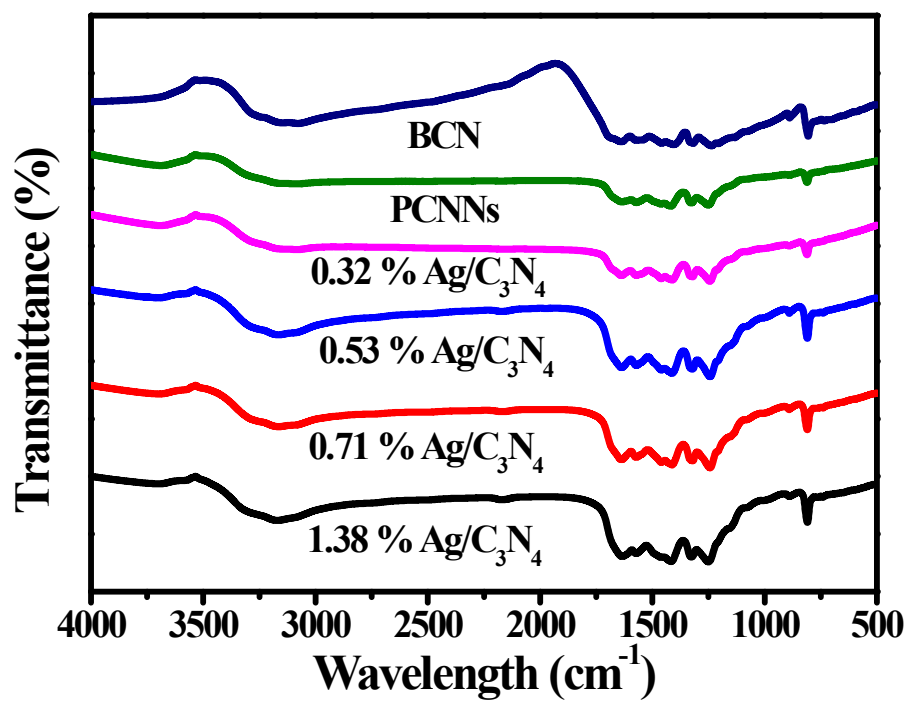

Fig. S2 FT-IR spectra over the as-prepared catalysts.

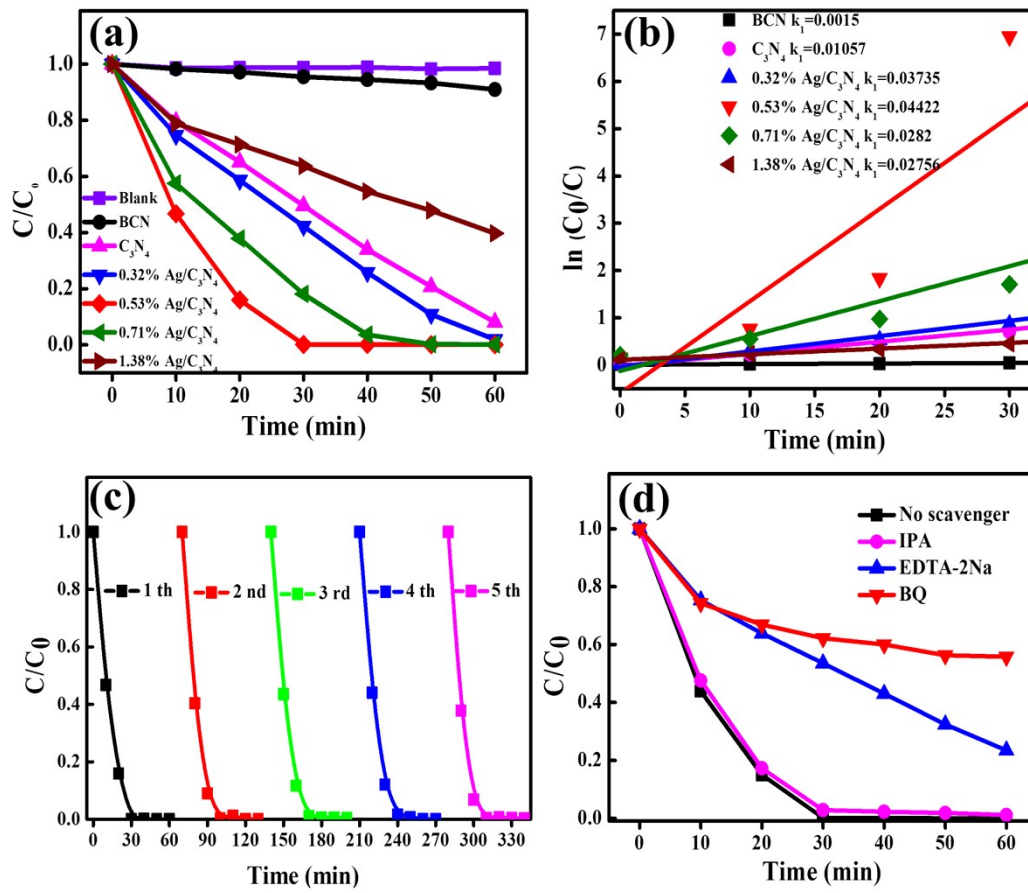

**Fig. S3** (a) Photocatalytic degradation of RhB, (b) the first-order-kinetic plots of all the samples, (c) the stability of the 0.53% Ag/C<sub>3</sub>N<sub>4</sub>, and (d) photocatalytic degradation of RhB over 0.53% Ag/C<sub>3</sub>N<sub>4</sub> in the presence of different radical scavengers.

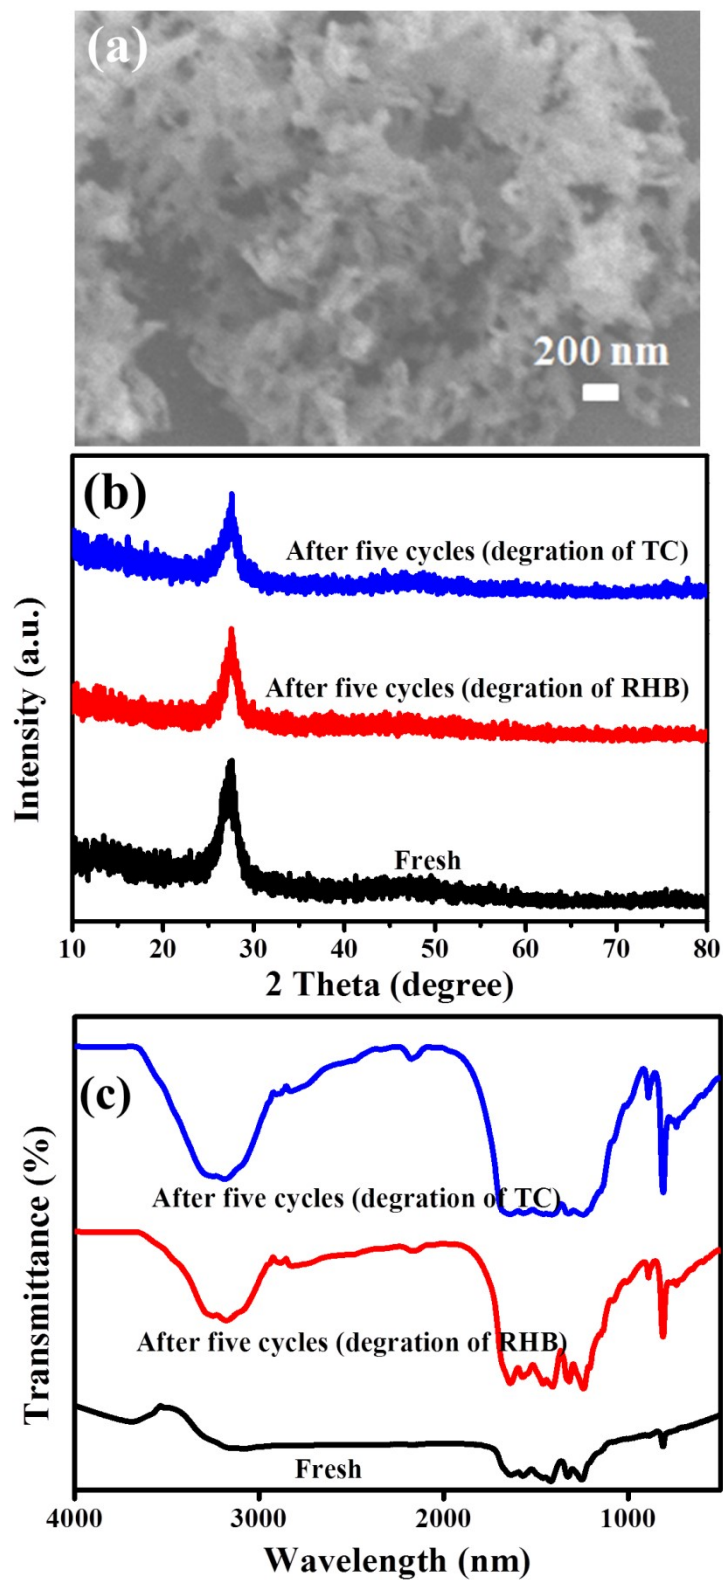

**Fig. S4** The comparisons of (a) SEM patterns, (b) XRD patterns and (c) FT-IR spectra of 0.53 % Ag/C<sub>3</sub>N<sub>4</sub> before and after photocatalytic degradation.

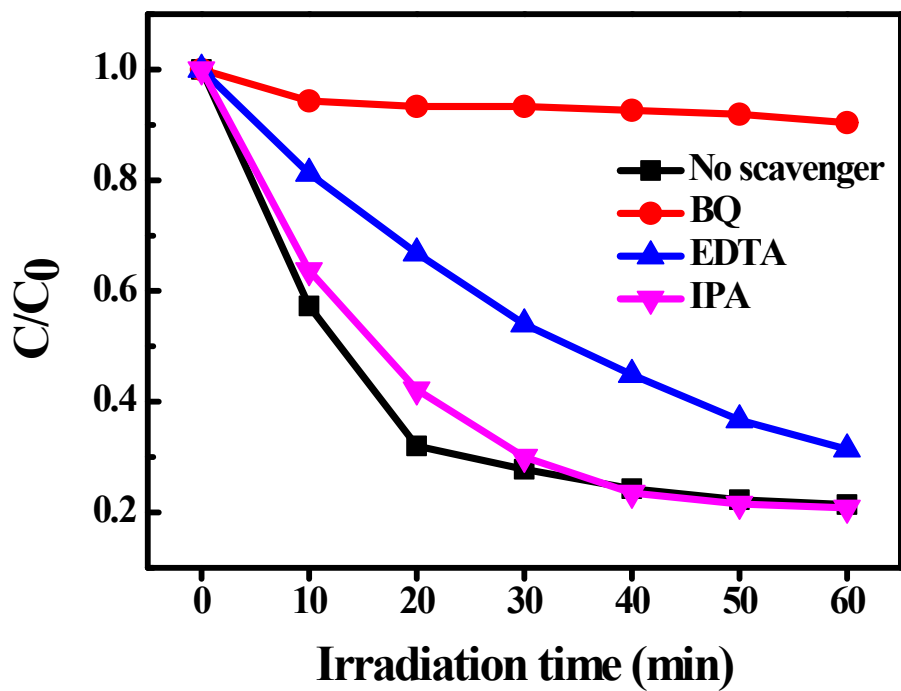

**Fig. S5** Photocatalytic degradation of TC over 0.53% Ag/C<sub>3</sub>N<sub>4</sub> in the presence of different radical scavengers.

Table S1 The surface characteristics of the as-prepared catalysts.

| Sample                            | $S_{\text{BET}}$ ( $\text{m}^2\text{g}^{-1}$ ) | Pore size (nm) | Pore volume ( $\text{cm}^3\text{g}^{-1}$ ) |
|-----------------------------------|------------------------------------------------|----------------|--------------------------------------------|
| BCN                               | 9.4429                                         | 20.4081        | 0.048178                                   |
| PCNNs                             | 40.4584                                        | 15.6042        | 0.15783                                    |
| 0.53 % Ag/ $\text{C}_3\text{N}_4$ | 78.7804                                        | 14.3292        | 0.28221                                    |

Table S2 The elemental composition of BCN, PCNNs and 0.53 % Ag/C<sub>3</sub>N<sub>4</sub>.

| <b>Sample</b>                           | <b>C 1s (At. %)</b> | <b>N 1s (At. %)</b> | <b>O 1s (At. %)</b> | <b>Ag 3d (At. %)</b> | <b>C/N</b> |
|-----------------------------------------|---------------------|---------------------|---------------------|----------------------|------------|
| BCN                                     | 53.1                | 42.86               | 4.04                | 0.00                 | 1.239      |
| PCNNs                                   | 59.93               | 34.6                | 5.47                | 0.00                 | 1.732      |
| 0.32 % Ag/C <sub>3</sub> N <sub>4</sub> | 50.24               | 44.68               | 4.57                | 0.33                 | 1.124      |
| 0.53 % Ag/C <sub>3</sub> N <sub>4</sub> | 53.15               | 39.98               | 6.48                | 0.39                 | 1.329      |
| 0.79 % Ag/C <sub>3</sub> N <sub>4</sub> | 51.44               | 41.57               | 6.52                | 0.47                 | 1.237      |
| 1.38 % Ag/C <sub>3</sub> N <sub>4</sub> | 62.71               | 31.32               | 5.44                | 0.53                 | 2.002      |



Table S3 Dynamics analysis of emission decay for the different samples.

| <b>sample</b>                           | <b><math>\tau_1</math></b> | <b><math>\tau_2</math></b> | <b><math>\tau_3</math></b> | <b><math>\tau_{\text{average}}</math></b> |
|-----------------------------------------|----------------------------|----------------------------|----------------------------|-------------------------------------------|
| BCN                                     | 2.507 ns                   | 7.61 ns                    | 36.47 ns                   | 12.62ns                                   |
| PCNNs                                   | 1.382 ns                   | 4.937 ns                   | 23.9 ns                    | 7.568ns                                   |
| 0.53 % Ag/C <sub>3</sub> N <sub>4</sub> | 0.9168 ns                  | 4.492 ns                   | 28.72 ns                   | 5.629ns                                   |
